# Supplementary material for: Forecasting Blood Supply and Demand under Population Aging: Implications and Challenges for Healthcare Resource Allocation
Source: Research Square preprint supplement (doi:10.21203/rs.3.rs-7800748/v1), 2025-12-08
Supplement: Supplementary file 1 [file 8cbda9a6b6bc66b02bce37ed.docx]

**TABLE 1.** SWOT matrix and corresponding strategies

|  | | **Strengths** | INTERNAL FACTORS | **Weaknesses** | INTERNAL FACTORS |
| --- | --- | --- | --- | --- | --- |
| - Established blood supply and safety system - Strong voluntary donation culture - Advanced medical technology and transfusion safety | | - Blood product wastage (over-ordering, expiration) - Low engagement of younger donors - Lack of real-time cross-hospital inventory | |
| **Opportunities** | EXTERNAL FACTORS | **S/O Strategies** | | **W/O Strategies** | |
| - AI and big data for supply-demand forecasting - International collaboration and best practices - Emerging technologies (synthetic blood, cell therapies) - Integration with long-term care and public health policies | | - Apply AI-driven demand forecasting in Taiwan’s blood system - Expand voluntary donation via digital platforms, peer networks, campuses, and health education - Leverage international collaboration for synthetic blood and advanced medical technologies - Use intraoperative autotransfusion and minimally invasive surgery | | - Enhance education/outreach to boost youth donation - Build AI-supported, real-time cross-hospital inventory system - Adopt international best practices to reduce inefficiencies - Develop proactive donor recruitment, including older healthy individuals - Reconsider transfusion eligibility criteria | |
| **Threats** | EXTERNAL FACTORS | **S/T Strategies** | | **W/T Strategies** | |
| - Declining eligible donors (17–65 years) - Rising demand from population aging - Vulnerability to pandemics/disasters - Changing social values affecting donation | | - Use strong infrastructure to maintain supply in emergencies - Promote donor retention to counter shrinking donor pool - Improve preservation to extend shelf life and ease shortages - Implement patient blood management, optimize surgical techniques, and enforce stricter transfusion guidelines | | - Reduce wastage via optimized transfusion practices - Increase donor engagement to offset population decline - Prepare contingency plans for outbreaks/disasters - Reevaluate transfusion eligibility criteria | |
|  | |
